# Supplementary material for: Multi-Layered Molecular Profiling Informs the Diagnosis and Targeted Therapy of Desmoplastic Small Round Cell Tumor
Source: Research Square preprint supplement (doi:10.21203/rs.3.rs-6104125/v1), 2025-03-27
Supplement: Supplementary file 1 [file 17584a677d1a94c5cb510029.xlsx]

## Sheet: Supplementary Table 1
							TL1		TL2		TL3		TL4		TL5		TL6		TL7		TL8		TL9		TL10		TL11		TL12
PID	CTX (n)A	TL (n)	CTX	SX	RT	HIPEC	Type	TM1	Type	TM2	Type	TM3	Type	TM4	Type	TM5	Type	TM6	Type	TM7	Type	TM8	Type	TM9	Type	TM10	Type	TM11	Type	TM12
DSRCT-01	2	3	x	x	-	-	SX	-	CTX	doxorubicin, ifosfamide	CTX	cyclophosphamide, topotecan	-	-	-	-	-	-	-	-	-	-	-	-	-	-	-	-	-	-
DSRCT-02	3	4	x	x	-	-	SX	-	CTX	FOLFOX	CTX	carboplatin, etoposide	CTX	VIDE	-	-	-	-	-	-	-	-	-	-	-	-	-	-	-	-
DSRCT-03	3	3	x	-	-	-	CTX	PEB	CTX	CEVAIE	CTX	trofosfamide	-	-	-	-	-	-	-	-	-	-	-	-	-	-	-	-	-	-
DSRCT-04	1	3	x	x	-	-	SX	-	CTX	VAIA	SX	-	-	-	-	-	-	-	-	-	-	-	-	-	-	-	-	-	-	-
DSRCT-05	2	2	x	-	-	-	CTX	carboplatin, etoposide	CTX	VIDE	-	-	-	-	-	-	-	-	-	-	-	-	-	-	-	-	-	-	-	-
DSRCT-06	4	4	x	-	-	-	CTX	carboplatin, etoposide	CTX	topotecan	PKI	everolimus	CTX	gemcitabine, irinotectan	-	-	-	-	-	-	-	-	-	-	-	-	-	-	-	-
DSRCT-07	2	3	x	x	-	-	SX	-	CTX	VIDE	CTX	irinotecan, TMZ	-	-	-	-	-	-	-	-	-	-	-	-	-	-	-	-	-	-
DSRCT-08	2	5	x	x	x	-	CTX	VAIA	CTX	doxorubicin, ifosfamide (+ regional hyperthermia therapy)	SX	-	RT	-	SX	-	-	-	-	-	-	-	-	-	-	-	-	-	-	-
DSRCT-09	1	1	x	-	-	-	CTX	carboplatin, paclitaxel	-	-	-	-	-	-	-	-	-	-	-	-	-	-	-	-	-	-	-	-	-	-
DSRCT-10	2	2	x	-	-	-	CTX	carboplatin, paclitaxel	CTX	VIDE	-	-	-	-	-	-	-	-	-	-	-	-	-	-	-	-	-	-	-	-
DSRCT-11	3	5	x	x	x	x	CTX	VIDE	SX	-	HIPEC	cisplatin, doxorubicin	CTX	irinotecan, TMZ	RT	-	-	-	-	-	-	-	-	-	-	-	-	-	-	-
DSRCT-12	7	8	x	x	-	x	PKI	trametinib, dabrafenib	CTX	doxorubicin, ifosfamide	CTX	VIDE	SX	-	HIPEC	-	CTX	vincristine, dactinomycin, ifosfamide	CTX	trofosfamide	CTX	trabectedin	-	-	-	-	-	-	-	-
DSRCT-13	5	9	x	x	x	-	SX	-	CTX	VIDE	CTX	VAI	CTX	VAC	RT	-	CTX	irinotecan, TMZ	HD/ASCT	treosulfan, melphalan, ASCT	SX	-	CTX	cyclophosphamide, topotecan	-	-	-	-	-	-
DSRCT-14	5	11	x	x	x	-	SX	-	CTX	VIP	SX	-	SX	-	SX	-	CTX	carboplatin, paclitaxel, gemcitabine	VX	vaccination with DC	RT	-	RT	-	CTX	cisplatin, etoposide	CTX	bicalutamide	-	-
DSRCT-15	2	2	x	-	-	-	CTX	carboplatin, taxol	CTX	VIDE	-	-	-	-	-	-	-	-	-	-	-	-	-	-	-	-	-	-	-	-
DSRCT-16	5	6	x	x	-	-	CTX	cisplatin, etoposide	CTX	carboplatin, etoposide	SX	-	CTX	VIP-E (carboplatin)	HD/ASCT	-	CTX	VIDE	-	-	-	-	-	-	-	-	-	-	-	-
DSRCT-17	4	5	x	x	-	-	CTX	carboplatin, paclitaxel	CTX	VAI	CTX	trofosfamide, idarubicin	SX	-	CTX	temsirolimus, vinorelbine	-	-	-	-	-	-	-	-	-	-	-	-	-	-
DSRCT-18	3	4	x	x	-	x	CTX	VIDE	SX	-	HIPEC	cisplatin, doxorubicin	CTX	topotecan, cyclophosphamide	-	-	-	-	-	-	-	-	-	-	-	-	-	-	-	-
DSRCT-19	3	5	x	x	-	x	SX	-	CTX	VIDE	SX	-	HIPEC	cisplatin	CTX	VAI	-	-	-	-	-	-	-	-	-	-	-	-	-	-
DSRCT-20	3	3	x	-	-	-	CTX	FOLFIRINOX	CTX	irinotecan, oxaliplatin, 5-FU	CTX	FOLFIRINOX	-	-	-	-	-	-	-	-	-	-	-	-	-	-	-	-	-	-
DSRCT-21	5	5	x	-	-	-	CTX	HD-CAV	CTX	ifosfamide, etoposide	HD/ASCT	thiotepa, carboplatin, ASCT	PKI	pazopanib	-	-	-	-	-	-	-	-	-	-	-	-	-	-	-	-
DSRCT-22	1	1	x	-	-	-	CTX	irinotecan, TMZ	-	-	-	-	-	-	-	-	-	-	-	-	-	-	-	-	-	-	-	-	-	-
DSRCT-23	6	10	x	x	-	x	SX	-	HIPEC	cisplatin, doxorubicin	CTX	VIDE	RHT	RHT	CTX	ifosfamide, carboplatin, etoposide	CTX	trofosfamide, idarubicin, etoposide	SX	-	SX	-	CTX	cyclophosphamide, vinorelbine	PKI	pazopanib	-	-	-	-
DSRCT-24	2	1	x	-	-	-	CTX	VIDE	-	-	-	-	-	-	-	-	-	-	-	-	-	-	-	-	-	-	-	-	-	-
DSRCT-25	1	1	x	-	-	-	CTX	HD-CAV	-	-	-	-	-	-	-	-	-	-	-	-	-	-	-	-	-	-	-	-	-	-
DSRCT-26	7	10	x	x	x	-	CTX	VIDE	SX	-	RT	-	CTX	VIDE	CTX	VAC	CTX	dactinomycin, cyclophosphamide	HD/ASCT	treosulfan, telphalan, ASCT	SX	-	CTX	gemcitabine, docetaxel	CTX	irinotecan, TMZ	-	-	-	-
DSRCT-27	7	12	x	x	x	-	CTX	VIDE	SX	-	RCHT	-	RT	-	SX	-	SX	-	SX	-	PKI	pazopanib	CTX	trabectedin	CTX	trabectedin	CTX	trofosfamide	CTX	doxorubicin
DSRCT-28	10	10	x	-	-	-	CTX	cisplatin, 5-FU, doxetaxel	CTX	cabecitabine	IC	nivolumab	CTX	doxorubicin	CTX	nab-paclitaxel, carboplatin	IC	nivolumab, ipilimumab	PKI	palbociclib, letrozol	CTX	gemcitabine	CTX	capecitabine	CTX	paclitaxel	-	-	-	-
DSRCT-29	1	1	x	-	-	-	CTX	VIDE	-	-	-	-	-	-	-		-	-	-	-	-	-	-	-	-	-	-	-	-	-
DSRCT-30	5	6	x	x	-	-	CTX	VAIA	CTX	VIDE	CTX	trabectedin	SX	-	CTX	cyclophosphamide, topotecan	CTX	irinotecan, TMZ	-	-	-	-	-	-	-	-	-	-	-	-
A: before first MTB
Abbreviations:
ASCT, autologous stem cell transplantion
CEVAIE, carboplatin, epirubicin, vincristine, ifosfamide, actinomycin D, etoposide
CTX, chemotherapy
FOLFIRINOX, 5-fluorouracil, leucovorin, irinotecan, oxaliplatin
HD-CAV, high-dose cyclophosphamide, adriamycin, vincristine
HD/ASCT, high dose chemotherapy, autologous stem cell transplant
HIPEC, hyperthermic intraperitoneal chemotherapy
IC, immune therapy
ICE, ifosphamide, carboplatin,
MTB, molecular tumor board
PEB, cisplatin, etoposide, bleomycin
PID, patient identifier
PKI, protein kinase inhibition
RCHT, radiochemotherapy
RT, radiation
SX, surgery
TL, treatment line
TM, treatment mode
TMZ, temozolomide
VAC, vincristine, dactinomycin, cyclophosphamide
VAI, vincristine, dactinomycin, ifosfamide
VAIA, vincristine, dactinomycin [actinomycin D], ifosfamide, doxorubicin
VIDE, vincristine, ifosfamide, doxorubicin, etoposide
VIP, etoposide, ifosfamide, cisplatin
ifosfamide, carboplatin, etoposide
VX, vaccination
