# Supplementary material for: Multi-Layered Molecular Profiling Informs the Diagnosis and Targeted Therapy of Desmoplastic Small Round Cell Tumor
Source: Research Square preprint supplement (doi:10.21203/rs.3.rs-6104125/v1), 2025-03-27
Supplement: Supplementary file 2 [file 450a5423ccc3c06ca31196da.xlsx]

## Sheet: Supplementary Table 2
		1. Recommendation											2. Recommendation										3. Recommendation											4. Recommendation										5. Recommendation
PID	MTB [n]	Basket	Class1	Drug1	Drug2	Drug3	BM1	BM2	BM3	BM4	BM5		Basket	Class1	Drug1	Drug2	Drug3	BM1	BM2	BM3	BM4		Basket	Class1	Drug1	Drug2	Drug3		BM1	BM2	BM3	BM4		Basket	Class1	Drug1	Drug2	Drug3	BM1	BM2	BM3	BM4		Basket	Class1	Drug1	Drug2	BM1	BM2
DSRCT-01	1	TK	MKI	pazopanib	-	-	FLT1	-	-	-	-	SNV	TK	MKI	dasatinib	-	-	EPH3	-	-	-	SNV	-	-	-	-	-	-	-	-	-	-	-	-	-	-	-	-	-	-	-	-	-	-	-	-	-	-	-
DSRCT-02	1	-	-	-	-	-	-	-	-	-	-	-	-	-	-	-	-	-	-	-	-	-	-	-	-	-	-	-	-	-	-	-	-	-	-	-	-	-	-	-	-	-	-	-	-	-	-	-	-
DSRCT-03	1	TK	MET-i	crizotinib	-	-	-	-	-	-	-	EXP	TK	-	pazopanib	ponatinib	lenvatinib	FLT4	PDGFA	FGFR4	-	EXP	DDR	PARP-i	-	-	-	-	DEL PALB2, ERCC4, BRCA1	-	-	-	iBM	IT	ICI	pembrolizumab	-	-	PD-1	-	-	-	EXP	-	-	-	-	-	-
DSRCT-04	1	OTH	-	EWING 2008	-	-	-	-	-	-	-	FUS	-	-	-	-	-	-	-	-	-	-	-	-	-	-	-	-	-	-	-	-	-	-	-	-	-	-	-	-	-	-	-	-	-	-	-	-	-
DSRCT-05	1	OTH	-	EWING 2008	-	-	-	-	-	-	-	FUS	-	-	-	-	-	-	-	-	-	-	-	-	-	-	-	-	-	-	-	-	-	-	-	-	-	-	-	-	-	-	-	-	-	-	-	-	-
DSRCT-06	1	-	-	CTX	-	-	-	-	-	-	-	-	-	-	-	-	-	-	-	-	-	-	-	-	-	-	-	-	-	-	-	-	-	-	-	-	-	-	-	-	-	-	-	-	-	-	-	-	-
DSRCT-07	1	TK	ERBB-i	lapatinib	pertuzumab	-	ERBB2	NRG1	-	-	-	EXP	-	-	-	-	-	-	-	-	-	-	-	-	-	-	-	-	-	-	-	-	-	-	-	-	-	-	-	-	-	-	-	-	-	-	-	-	-
DSRCT-07	2	TK	MKI	imatinib	-	-	PDGFRB	-	-	-		CNV	PAM	mTOR-i	AKT inhibitor	-	-	RICTOR	-	-	-	CNV	DDR	PARP-i	-	-	-	ERCC1	-	-	-	-	CNV	-	-	-	-	-	-	-	-	-	-	-	-	-	-	-	-
DSRCT-08	1	-	-	-	-	-	-	-	-	-	-	-	-	-	-	-	-	-	-	-	-	-	-	-	-	-	-	-	-	-	-	-	-	-	-	-	-	-	-	-	-	-	-	-	-	-	-	-	-
DSRCT-09	1	PAM	mTOR	everolimus	-	-	mTOR	-	-	-	-	SNV	OTH	-	VIDE	-	-	EWSR1	WT1	-	-	FUS	-	-	-	-	-	-	-	-	-	-	-	-	-	-	-	-	-	-	-	-	-	-	-	-	-	-	-
DSRCT-10	1	TK	MKI	crizotinib	ponatinib	infigratinib	NTRK3	FGFR4	-	-	-	EXP											-	-	-	-	-	-	-	-	-	-	-	-	-	-	-	-	-	-	-	-	-	-	-	-	-	-	-
DSRCT-10	1	TK	MKI	pazopanib	sunitinib	ponatinib	KDR	FGFR4	-	-	-	EXP	TK	ALK-i	crizotinib	-	-	ALK	-	-	-	EXP	-	-	-	-	-	-	-	-	-	-	-	-	-	-	-	-	-	-	-	-	-	-	-	-	-	-	-
DSRCT-10	2	THER	theranostics	SSTR3 PRRT	-	-	SSTR3	SSTR5	-	-	-	EXP	TK	MKI	ponatinib	-	FGFR4	-	-	-		EXP	DDR	PARP-i + CHT	-	-	-	-	AC3 BRCAness 18%					-	-	-	-	-	-	-	-	-	-	-	-	-	-	-	-
DSRCT-11	1	TK	ERBB-i	afatinib	-	-	-	-	-	-	-	EXP	TK	MKI	sorafenib	-	-	KDR	RAF1	-	-	EXP	-	-	-	-	-	-	-	-	-	-	-	-	-	-	-	-	-	-	-	-	-	-	-	-	-	-	-
DSRCT-12	1	TK	MKI	pazopanib	sunitinib	-	KDR	FGFR4	-	-	-	EXP	TK	MKI	ponatinib	-	-	FGFR4	-	-	-	EXP	TK	ALK-i	crizotinib	entrectinib	-	-	NTRK3	-	-	-	EXP	-	-	-	-	-	-	-	-	-	-	-	-	-	-	-	-
DSRCT-13	1	TK	MKI	pazopanib	-	-	-	-	-	-	-	EXP	-	-	-	-	-	-	-	-	-	-	-	-	-	-	-	-	-	-	-	-	-	-	-	-	-	-	-	-	-	-	-	-	-	-	-	-	-
DSRCT-13	2	TK	MKI	cabozantinib	-	-	MET	-	-	-	-	CNV	DDR	PARP-i + CHT	-	-	-	AC3 BRCAness 3%	-	-	-	-	-	-	-	-	-	-	-	-	-	-	-	-	-	-	-	-	-	-	-	-	-	-	-	-	-	-	-
DSRCT-13	3	TK	MKI	cabozantinib	ponatinib	lenvatinib	KDR	FGFR4	MERTK	FLT4	-	EXP	DDR	PARP-i + CHT	olaparib + trabectedin	-	-	AC3 BRCAness 18%, SNV CDK12	-	-	-	iBM	IT	CAR-T	CLDN6 CAR-T cells		-		CLDN6				EXP	-	-	-	-	-	-	-	-	-	-	-	-	-	-	-	-
DSRCT-14	1	DDR	PARP-i + CHT	olaparib + trabectedin	-	-	AC8 BRCAlike, high EXP SLFN11	-	-	-	-	iBM	TK	MKI	ponatinib	-	-	KDR	FGFR4	-	-	EXP	-	-	-	-	-	-	-	-	-	-	-	-	-	-	-	-	-	-	-	-	-	-	-	-	-	-	-
DSRCT-15	1	OTH	androgen blockade	leuprorelin	bicalutamide	-	AR	ESR1	-	-	-	EXP	TK	MKI	FGFR inhibitor	-	-	FGFR4	FGFR2	VEGFA	-	EXP	TK	MKI	-	-	-	-	FGFR4	FGFR2	VEGFA	-	EXP	PAM	mTOR-i	temsirolimus	-	-	PTEN	-	-	-	Insertion	-	-	-	-	-	-
DSRCT-16	1	OTH	androgen blockade	-	-	-	AR	ESR1	-	-	-	EXP	TK	MKI	bevacicumab	-	-	KDR	FGFR4	-	-	EXP	TK	MKI	ponatinib	sunitinib	pazopanib	regorafenib	KDR	FGFR4	-	-	EXP	IT	ICI	-	-	-	PD-L1	PD-1	CTLA4	LAB3	EXP	DDR	PARP-i + CHT	-	-	DEL BRCA1; EXP BRCA1; EXP BRCA2; DEL FANCE; EXP FANCE; DEL RAD51; EXP RAD51	-
DSRCT-17	1	DDR	PARP-i + CHT	olaparib + trabectedin	-	-	AC3 BRCAness 10%; AC8 BRCAlike 30%; PARP1 AMP; PARP2 AMP; ATM DEL; PALB2 DEL; ESWR1:WT1 FUS	-	-	-	-	iBM	IT	antibody	zolbetuximab	-	-	CLDN18.2	-	-	-	EXP	DDR	PARP-i	-	-	-	-	AC 3 BRCAness 10%; AC8 BRCAlike 30%; PARP1 AMP; PARP2 AMP; ATM DEL; PALB2 DEL; ESWR1:WT1 FUS	-	-	-	iBM	TK	MKI	NTRK-i	MERTK-i	-	NTRK3	MERTK	-	-	EXP	OTH	BET-i	-	-	ASCL1	BRD3
DSRCT-18	1	TK	MKI	VEGF inhibitor	-	-	KDR	-	-	-	-	EXP	TK	ERBB-i	-	-	-	ERBB2	-	-	-	EXP	PAM	mTOR-i	-	-	-	-	PTEN	-	-	-	CNV (DEL)	RME	RAF-i	-	-	-	-	-	RAF1	-	EXP	-	-	-	-	-	-
DSRCT-19	1	TK	MKI	MKI	-	-	KDR	-	-	-	-	EXP	TK	ERBB-i	-	-	-	ERBB2	-	-	-	EXP	IT	ICI	-	-	-	-	AC2 APOBEC 15%	-	-	-	-	CC	CDK4/6-i	-	-	-	CCND1	-	-	-	EXP	OTH	androgen blockade	-	-	AR	-
DSRCT-20	1	THER	theranostics	SSTR3 PRRT	-	-	SSTR3	-	-	-	-	EXP	TK	MKI	ponatinib	-	-	KDR	FYN	PDGFRB	-	EXP	TK	MKI	FGFR4-i	PI3K-i	-	-	FGFR4	AKT2	AKT4	-	EXP	TK	NTRK-i	crizotinib	-	-	NTRK3	-	-	-	EXP	IT	antibody	anetumab ravtansine	-	MSLN	-
DSRCT-21	1	TK	MKI	pazopanib	apatinib	-	KDR	NTRK3	FLT4	PDGFA	LCK	EXP	DDR	PARP-i + CHT	olaparib + trabectedin	-	-	AC3 BRCAness 33%, loss FANCA, BAP1, WDR48, TOP2B, high EXP SLFN11	-	-	-	iBM	IT	antibody	zolbetuximab	-	-	-	CLDN18.2	-	-	-	EXP	OTH	BET-i	-	-	-	ASCL1	-	-	-	EXP	-	-	-	-	-	-
DSRCT-22	1	TK	MKI	ponatinib	-	-	KDR	PDGFA	-	-	-	EXP	THER	theranostics	SSTR3 PRRT	-	-	SSTR3	-	-	-	EXP	TK	MKI	FGFR4-i	PI3K-i	-	-	FGFR4	-	-	-	EXP	TK	NTRK-i	crizotinib	larotrectinib	-	NTRK3	-	-	-	EXP	-	-	-	-	-	-
DSRCT-23	1	THER	theranostics	SSTR3 PRRT	-	-	SSTR3	-	-	-	-	EXP	TK	MKI	FGFR inhibitor	-	-	FGFR4	-	-	-	EXP	IT	CAR-T	CLDN6 CAR-T cells	-	-	-	CLDN6	-	-	-	EXP	OTH	BET-i	-	-	-	ASCL1	-	-	-	EXP	TK	MKI	NTRK-i	-	NTRK3	-
DSRCT-24	1	TK	MKI	sunitinib	-	-	KDR	PDGFA	-	-	-	EXP	THER	theranostics	SSTR3 PRRT	-	-	SSTR3	-	-	-	EXP	-	-	-	-	-	-	-	-	-	-	-	-	-	-	-	-	-	-	-	-	-	-	-	-	-	-	-
DSRCT-24	2	THER	theranostics	SSTR3 PRRT	-	-	-	SSTR3	-	-	-	EXP	IT	CAR-T	CLDN6 CAR-T cells	-	-	CLDN6	-	-	-	EXP	TK	MKI	pazopanib	-	-	-	FLT4	PDGFA	-	-	EXP	TK	MKI	rogaratinib	ponatinib	erdafitinib	FGFR4	-	-	-	EXP	-	-	-	-	-	-
DSRCT-25	1	TK	MKI	pazopanib	-	-	NTRK3	PDGFA	-	-	-	EXP	THER	theranostics	SSTR3 PRRT	-	-	SSTR3	-	-	-	EXP	PAM	mTOR-i	-	-	-	-	PTEN	-	-	-	CNV (DEL)	IT	CAR-T	CLDN6 CAR-T cells	-	-	CLDN6	-	-	-	EXP	-	-	-	-	-	-
DSRCT-26	1	DDR	PARP-i + CHT	olaparib + trabectedin	-	-	AC3 BRCAness 31%	-	-	-	-	iBM	-	-	-	-	-	-	-	-	-	-	-	-	-	-	-	-	-	-	-	-	-	-	-	-	-	-	-	-	-	-	-	-	-	-	-	-	-
DSRCT-27	1	TK	ERBB-i	neratinib	afatinib	-	ERBB2	ERBB4	NRG2	-	-	EXP	TK	MKI	-	-	-	-	-	-	-	-	DDR	PARP-i + CHT	olaparib + trabectedin	-	-	-	AC8 BRCA-like 35%, AC3 BRCAness 29%; high EXP SLFN11	-	-	-	iBM	THER	theranostics	SSTR3 PRRT	-	-	SSTR3	-	-	-	EXP	-	-	-	-	-	-
DSRCT-28	1	TK	MKI	pazopanib	-	-	KDR	FGFR4	PDGFA	MERTK	-	EXP	IT	CAR-T	CLDN6 CAR-T cells	-	-	CLDN6	-	-	-	EXP	THER	theranostics	SSTR3 PRRT	-	-	-	SSTR3	-	-	-	EXP	ADC	ERBB2-i	T-DXd	-	-	ERBB2	-	-	-	EXP	-	-	-	-	-	-
DSRCT-29	1	IT	CAR-T	CLDN6 CAR-T cells	-	-	CLDN6	-	-	-	-	EXP	TK	MKI	pazopanib	cabozantinib	-	KDR	FGFR4	FYN	AXL	EXP	TK	MKI	pazopanib	-	-	-	mTOR	-	-	-	EXP	OTH	androgen blockade	-	-	-	AR	-	-	-	EXP	-	-	-	-	-	-
DSRCT-30	1	ADC	ERBB-i	T-DXd	-	-	ERBB2	-	-	-	-	EXP	TK	ERBB-i	trastuzumab	-	-	ERBB2		-	-	EXP	THER	theranostics	VMAT2 PRRT	-	-	-	VMAT2	-	-	-	EXP	THER	theranostics	SSTR3 PRRT	-	-	SSTR3	-	-	-	EXP	-	-	-	-	-	-
ASCT, autologous stem cell transplantion
CEVAIE, carboplatin, epirubicin, vincristine, ifosfamide, actinomycin D, etoposide
CTX, chemotherapy
FOLFIRINOX, 5-fluorouracil, leucovorin, irinotecan, oxaliplatin
HD-CAV, high-dose cyclophosphamide, adriamycin, vincristinee
HD/ASCT, high dose chemotherapy, autologous stem cell transplant
HIPEC, hyperthermic intraperitoneal chemotherapy
IC, immune therapy
ICE, ifosphamide, carboplatin, etoposide
ICI, immune checkpoint inhibitor
MTB, molecular tumor board
PEB, cisplatin, etoposide, bleomycin
PID, patient identifier
PKI, protein kinase inhibition
RCHT, radiochemotherapy
RT, radiation
SX, surgery
TL, treatment line
TM, treatment mode
TMZ, temozolomide
VAC, vincristine, dactinomycin, cyclophosphamide
VAI, vincristine, dactinomycin, ifosfamide
VAIA, vincristine, dactinomycin [actinomycin D], ifosfamide, doxorubicin
VIDE, vincristine, ifosfamide, doxorubicin, etoposide
VIP, etoposide, ifosfamide, cisplatin
VIP-E, etoposide, ifosfamide, cisplatin, epirubicin
VX, vaccination
TK, tyrosine kinase
DDR, DNA damage repair
IT, immunotherapy
ADC, antibody-drug conjugate
OTH, other
CC, cell cycle
RME, RAF-MEK-ERK
RAM, PI3K-AKT-mTOR
AMP, amplification
iBM, integrated biomarker
CNV, copy number variant
DEL, deletion
FUS, fusion
MKI, multi kinase inhibitor
[truncated: 15 more columns]
